# Supplementary material for: Visible-light-induced water reduction reaction for efficient hydrogen production by N-doped In2Ga2ZnO7 nanoparticle decorated on RGO sheets
Source: Royal Society of Chemistry journal article supplement (doi:10.1039/c6qi00335d), 2016-01-01
Supplement: c6qi00335d1.pdf [file c6qi00335d1.pdf]

## **SUPPLEMENTARY INFORMATION**

### **Visible light induced water reduction reaction for efficient hydrogen production by N doped $\text{In}_2\text{Ga}_2\text{ZnO}_7$ nanoparticle decorated on RGO sheets**

**Deepak kumar Padhi<sup>ab</sup>, Kulamani Parida<sup>ac\*</sup> and S. K. Singh<sup>ab</sup>**

<sup>a</sup>Academy of Scientific and Innovative Research (AcSIR), Council of Scientific and Industrial Research, Anusandhan Bhawan, 2 Rafi Marg, New Delhi-110 001, India.

<sup>b</sup> Advanced Materials Technology Department, CSIR-Institute of Minerals and Materials Technology, Bhubaneswar – 751 013, Odisha, India.

<sup>c</sup> Centre for Nano Science and Nano Technology, ITER, Sikha 'O' Anusandhan University, Bhubaneswar—751 030, Odisha, India.

---

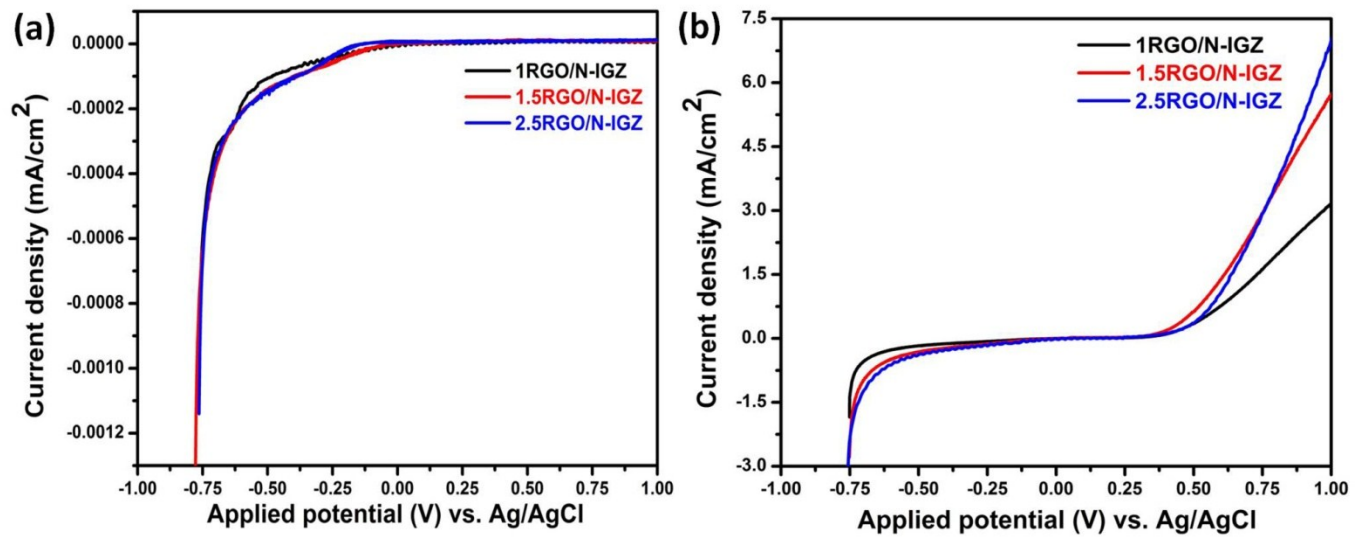

**Figure S1.** (a) & (b) Photocurrent spectra of 1RGO/N-IGZ, 1.5RGO/N-IGZ and 2.5RGO/N-IGZ nanocomposite in dark and under irradiation of visible light ( $\lambda \geq 400$  nm), respectively.
